# Supplementary material
Source: publisher figshare collection journal article supplement (https://springernature.figshare.com/ndownloader/files/15469796)
Supplement: Supplementary file [file 15469796]

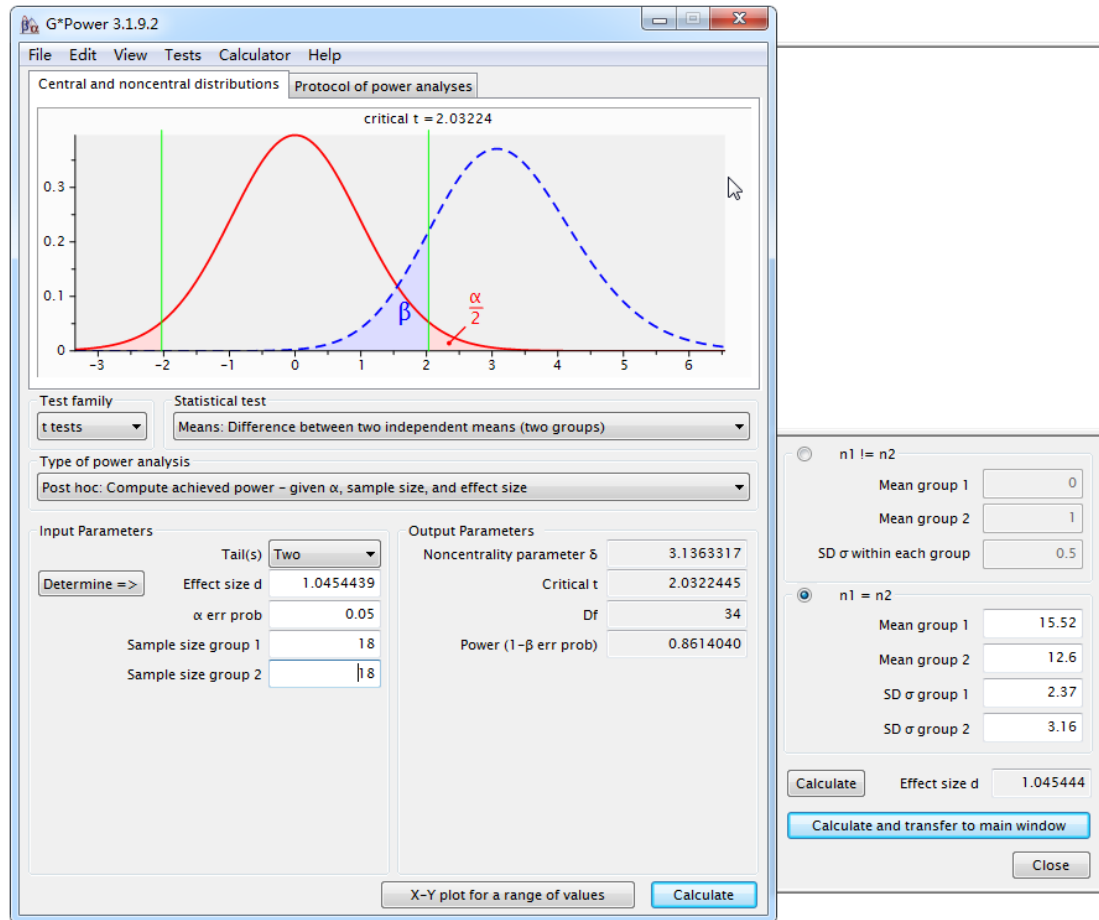

**Additional file 3. Figure S3. The main window of the post hoc power analysis specification in Gpower 3.1 and the “effect size” drawer. Take the 1-methylhistidine selected between the control and HAE groups as an example.**
